# Supplementary material for: Self-Selection of Feeding Substrates by Tenebrio molitor Larvae of Different Ages to Determine Optimal Macronutrient Intake and the Influence on Larval Growth and Protein Content
Source: MDPI journal article supplement (doi:10.3390/insects13070657), 2022-07-21
Supplement: s1 [file s1]

---

*Supplementary material*

# **Self-Selection of Feeding Substrates by *Tenebrio molitor* Larvae of Different Ages to Determine Optimal Macronutrient Intake and the Influence on Larval Growth and Protein Content**

**Nina Kröncke <sup>1,\*</sup> and Rainer Benning <sup>1</sup>**

<sup>1</sup> Institute of Food Technology and Bioprocess Engineering, University of Applied Sciences Bremerhaven, An der Karlstadt 8, 27568 Bremerhaven, Germany, [nkroencke@hs-bremerhaven.de](mailto:nkroencke@hs-bremerhaven.de) (N.K.); [rbenning@hs-bremerhaven.de](mailto:rbenning@hs-bremerhaven.de) (R.B.)

\* Correspondence: [nkroencke@hs-bremerhaven.de](mailto:nkroencke@hs-bremerhaven.de); Tel.: +49-(0)-471-4823-269

**Table S1.** Nutritional composition (as specified by the manufacturer) of substrates on a fresh weight (FW) basis (%) used for *Tenebrio molitor* diets.

| Substrate            | Moisture (%) | Protein (% FW) | Fat (% FW) | Carbohydrates (% FW) | Fiber (% FW) | Ash (% FW) | Manufacturer                                                         |
|----------------------|--------------|----------------|------------|----------------------|--------------|------------|----------------------------------------------------------------------|
| Apricot kernel flour | 8.6          | 36.0           | 10.1       | 9.8                  | 34.2         | 1.3        | Grapoila, Virgin Oil Press Kft., Budapest, Hungary                   |
| Beet pulp (dry)      | 13.9         | 8.7            | 0.9        | 54.2                 | 17.8         | 4.5        | Nordzucker AG, Braunschweig, Germany                                 |
| Brewer's yeast       | 10.2         | 46.0           | 2.0        | 32.8                 | 1.0          | 8.0        | Leiber GmbH, Bramsche, Germany                                       |
| Chokeberry pomace    | 7.7          | 8.0            | 4.9        | 56.5                 | 20.8         | 2.1        | Holger Senger Vertrieb von Naturrohstoffen e. K., Dransfeld, Germany |
| Coconut flour        | 8.5          | 16.0           | 27.0       | 38.0                 | 8.7          | 1.8        | Fischmix, Iserlohn, Germany                                          |
| Fava bean hulls      | 9.8          | 4.2            | 2.3        | 28.1                 | 50.4         | 5.2        | Schierbecker Handels GmbH & Co. KG, Felde, Germany                   |
| Flaxseed flour       | 7.9          | 22.9           | 33.0       | 25.0                 | 6.6          | 4.6        | Fischmix, Iserlohn, Germany                                          |
| Flaxseed pomace      | 8.5          | 27.4           | 15.3       | 8.0                  | 34.6         | 6.2        | Demeterhof Schwab GmbH & Co. KG, Windsbach, Germany                  |
| Grape seed flour     | 5.2          | 10.5           | 4.6        | 20.0                 | 59.0         | 0.7        | Schoefer Naturprodukte, Schwerin, Germany                            |
| Lupine flour         | 5.6          | 43.0           | 12.0       | 10.0                 | 28.0         | 1.4        | Natura-Werk Gebr. Hiller GmbH & Co. KG, Hannover, Germany            |
| Maize hulls          | 10.5         | 8.1            | 4.9        | 64.0                 | 10.8         | 1.7        | Nordgetreide GmbH & Co. KG, Lübeck, Germany                          |
| Milk thistle flour   | 9.5          | 22.3           | 7.2        | 3.6                  | 46.6         | 10.8       | Grapoila, Virgin Oil Press Kft., Budapest, Hungary                   |
| Mustard flour        | 8.6          | 36.6           | 12.6       | 18.8                 | 23.0         | 0.4        | Wohltuer by suralogics GmbH, Dörfles-Esbach, Germany                 |
| Oat bran             | 9.8          | 14.0           | 7.8        | 50.0                 | 14.0         | 4.4        | Demeterhof Schwab GmbH & Co. KG, Windsbach, Germany                  |
| Oat flakes           | 9.4          | 13.5           | 7.0        | 58.7                 | 10.0         | 1.4        | Gut & Günstig, Edeka AG & Co. KG, Hamburg, Germany                   |
| Pea protein flour    | 2.7          | 80.0           | 8.0        | 4.9                  | 4.2          | 0.2        | Raab Vitalfood GmbH, Rohrbach, Germany                               |
| Potato flakes        | 9.2          | 8.3            | 0.5        | 76.2                 | 4.6          | 1.2        | Frießinger GmbH & Co. KG, Kirchberg/Murr, Germany                    |
| Psyllium seed husks  | 9.0          | 3.8            | 2.8        | 0.0                  | 84.1         | 0.3        | Müfagro Naturkosthandel GmbH, Gomadingen, Germany                    |
| Rapeseed cake meal   | 9.7          | 28.5           | 15.0       | 29.9                 | 11.0         | 5.9        | Fischmix, Iserlohn, Germany                                          |

---

|                           |      |      |      |      |      |     |                                                    |
|---------------------------|------|------|------|------|------|-----|----------------------------------------------------|
| Raspberry seed press cake | 4.8  | 8.6  | 6.0  | 28.2 | 50.8 | 1.6 | Schierbecker Handels GmbH & Co. KG, Felde, Germany |
| Rice flour                | 11.9 | 6.5  | 1.0  | 79.0 | 0.5  | 1.1 | Frießinger GmbH & Co. KG, Kirchberg/Murr, Germany  |
| Rice protein flour        | 3.9  | 80.0 | 2.9  | 9.6  | 3.3  | 0.3 | Raab Vitalfood GmbH, Rohrbach, Germany             |
| Tiger nut flour           | 7.5  | 3.8  | 26.2 | 39.8 | 20.8 | 1.9 | Himmelbauer GmbH, Aschaffenburg, Germany           |
| Wheat bran                | 12.0 | 14.9 | 4.7  | 45.0 | 17.7 | 5.7 | Aurora Mühlen GmbH, Hamburg, Germany               |
| Wheat flour               | 11.5 | 10.8 | 1.0  | 71.8 | 4.5  | 0.4 | Frießinger GmbH & Co. KG, Kirchberg/Murr, Germany  |

---

**Table S2.** Consumption (g dry weight) of all substrates eaten by *T. molitor* larvae at different ages (six-, eight- and ten-weeks-old) in four self-selection treatment combinations with eight choices; mean  $\pm$  standard deviation;  $n = 3$ .

| Substrate                 | Group                             |                                   |                                   |                                   |                                   |                                   |                                   |                                   |                                   |                                   |                                   |                                   |
|---------------------------|-----------------------------------|-----------------------------------|-----------------------------------|-----------------------------------|-----------------------------------|-----------------------------------|-----------------------------------|-----------------------------------|-----------------------------------|-----------------------------------|-----------------------------------|-----------------------------------|
|                           | 1/6                               | 1/8                               | 1/10                              | 2/6                               | 2/8                               | 2/10                              | 3/6                               | 3/8                               | 3/10                              | 4/6                               | 4/8                               | 4/10                              |
| Apricot kernel flour      |                                   |                                   |                                   |                                   |                                   |                                   |                                   |                                   |                                   | 0.00 $\pm$ 0.00                   | 0.00 $\pm$ 0.00                   | 0.00 $\pm$ 0.00                   |
| Beet pulp (dry)           |                                   |                                   |                                   |                                   |                                   |                                   |                                   |                                   |                                   | 0.00 $\pm$ 0.00                   | 0.00 $\pm$ 0.00                   | 0.20 $\pm$ 0.26                   |
| Brewer's yeast            |                                   |                                   |                                   | 0.00 $\pm$ 0.00                   | 0.15 $\pm$ 0.19                   | 0.23 $\pm$ 0.27                   | 0.00 $\pm$ 0.00                   | 0.05 $\pm$ 0.07                   | 0.04 $\pm$ 0.05                   |                                   |                                   |                                   |
| Chokeberry pomace         |                                   |                                   |                                   |                                   |                                   |                                   |                                   |                                   |                                   | 0.00 $\pm$ 0.00                   | 0.00 $\pm$ 0.00                   | 0.00 $\pm$ 0.00                   |
| Coconut flour             |                                   |                                   |                                   |                                   |                                   |                                   | 0.01 $\pm$ 0.02                   | 0.00 $\pm$ 0.00                   | 0.04 $\pm$ 0.01                   |                                   |                                   |                                   |
| Fava bean hulls           | 0.00 $\pm$ 0.00                   | 0.00 $\pm$ 0.00                   | 0.15 $\pm$ 0.11                   |                                   |                                   |                                   |                                   |                                   |                                   |                                   |                                   |                                   |
| Flaxseed flour            |                                   |                                   |                                   | 0.00 $\pm$ 0.00                   | 0.00 $\pm$ 0.00                   | 0.00 $\pm$ 0.00                   |                                   |                                   |                                   |                                   |                                   |                                   |
| Flaxseed pomace           |                                   |                                   |                                   |                                   |                                   |                                   |                                   |                                   |                                   | 0.00 $\pm$ 0.00                   | 0.00 $\pm$ 0.00                   | 0.00 $\pm$ 0.00                   |
| Grape seed flour          |                                   |                                   |                                   | 0.00 $\pm$ 0.00                   | 0.00 $\pm$ 0.00                   | 0.00 $\pm$ 0.00                   |                                   |                                   |                                   |                                   |                                   |                                   |
| Lupine flour              | 0.00 $\pm$ 0.00                   | 0.67 $\pm$ 0.29                   | 1.05 $\pm$ 0.38                   | 0.00 $\pm$ 0.00                   | 0.00 $\pm$ 0.00                   | 0.35 $\pm$ 0.32                   |                                   |                                   |                                   | 0.05 $\pm$ 0.00                   | 0.32 $\pm$ 0.25                   | 0.59 $\pm$ 0.22                   |
| Maize hulls               |                                   |                                   |                                   | 0.72 $\pm$ 0.09                   | 1.40 $\pm$ 0.08                   | 1.65 $\pm$ 0.02                   |                                   |                                   |                                   |                                   |                                   |                                   |
| Milk thistle flour        |                                   |                                   |                                   |                                   |                                   |                                   | 0.01 $\pm$ 0.01                   | 0.17 $\pm$ 0.08                   | 1.04 $\pm$ 0.56                   |                                   |                                   |                                   |
| Mustard flour             |                                   |                                   |                                   |                                   |                                   |                                   | 0.00 $\pm$ 0.00                   | 0.00 $\pm$ 0.00                   | 0.00 $\pm$ 0.00                   |                                   |                                   |                                   |
| Oat bran                  |                                   |                                   |                                   |                                   |                                   |                                   | 0.00 $\pm$ 0.00                   | 1.28 $\pm$ 0.99                   | 3.82 $\pm$ 0.89                   | 0.08 $\pm$ 0.01                   | 0.86 $\pm$ 0.79                   | 2.57 $\pm$ 0.36                   |
| Oat flakes                |                                   |                                   |                                   |                                   |                                   |                                   | 0.47 $\pm$ 0.09                   | 1.03 $\pm$ 0.97                   | 1.72 $\pm$ 0.51                   | 0.26 $\pm$ 0.01                   | 0.29 $\pm$ 0.21                   | 2.20 $\pm$ 0.74                   |
| Pea protein flour         | 0.00 $\pm$ 0.00                   | 0.00 $\pm$ 0.00                   | 0.00 $\pm$ 0.00                   |                                   |                                   |                                   |                                   |                                   |                                   |                                   |                                   |                                   |
| Potato flakes             | 0.00 $\pm$ 0.00                   | 0.16 $\pm$ 0.11                   | 1.33 $\pm$ 0.11                   |                                   |                                   |                                   |                                   |                                   |                                   |                                   |                                   |                                   |
| Psyllium seed husks       |                                   |                                   |                                   |                                   |                                   |                                   | 0.00 $\pm$ 0.00                   | 0.00 $\pm$ 0.00                   | 0.00 $\pm$ 0.00                   |                                   |                                   |                                   |
| Rapeseed cake meal        | 0.00 $\pm$ 0.00                   | 0.00 $\pm$ 0.00                   | 0.00 $\pm$ 0.00                   |                                   |                                   |                                   |                                   |                                   |                                   |                                   |                                   |                                   |
| Raspberry seed press cake |                                   |                                   |                                   | 0.00 $\pm$ 0.00                   | 0.00 $\pm$ 0.00                   | 0.13 $\pm$ 0.09                   |                                   |                                   |                                   |                                   |                                   |                                   |
| Rice flour                | 0.02 $\pm$ 0.03                   | 0.86 $\pm$ 0.12                   | 2.46 $\pm$ 0.28                   |                                   |                                   |                                   |                                   |                                   |                                   |                                   |                                   |                                   |
| Rice protein flour        |                                   |                                   |                                   | 0.00 $\pm$ 0.00                   | 0.22 $\pm$ 0.12                   | 2.23 $\pm$ 0.50                   |                                   |                                   |                                   |                                   |                                   |                                   |
| Tiger nut flour           | 0.00 $\pm$ 0.00                   | 0.00 $\pm$ 0.00                   | 0.39 $\pm$ 0.36                   |                                   |                                   |                                   |                                   |                                   |                                   |                                   |                                   |                                   |
| Wheat bran                | 1.12 $\pm$ 0.08                   | 2.51 $\pm$ 0.14                   | 4.48 $\pm$ 1.62                   | 0.39 $\pm$ 0.28                   | 1.72 $\pm$ 0.32                   | 3.05 $\pm$ 0.64                   | 0.46 $\pm$ 0.12                   | 1.48 $\pm$ 0.25                   | 3.19 $\pm$ 0.82                   |                                   |                                   |                                   |
| Wheat flour               |                                   |                                   |                                   |                                   |                                   |                                   |                                   |                                   |                                   | 0.72 $\pm$ 0.03                   | 0.52 $\pm$ 0.40                   | 0.85 $\pm$ 0.48                   |
| <b>Total consumption</b>  | <b>1.14 <math>\pm</math> 0.11</b> | <b>4.20 <math>\pm</math> 0.66</b> | <b>9.86 <math>\pm</math> 2.86</b> | <b>1.11 <math>\pm</math> 0.37</b> | <b>3.49 <math>\pm</math> 0.71</b> | <b>7.64 <math>\pm</math> 1.52</b> | <b>0.95 <math>\pm</math> 0.24</b> | <b>4.01 <math>\pm</math> 2.36</b> | <b>9.85 <math>\pm</math> 2.84</b> | <b>1.12 <math>\pm</math> 0.05</b> | <b>1.99 <math>\pm</math> 1.65</b> | <b>6.41 <math>\pm</math> 2.06</b> |

1/6, 2/6, 3/6, 4/6: six weeks old larvae fed with treatment 1, 2, 3 and 4; 1/8, 2/8, 3/8, 4/8: eight weeks old larvae fed with treatment 1, 2, 3 and 4; 1/10, 2/10, 3/10, 4/10: ten weeks old larvae fed with treatment 1, 2, 3 and 4.
